# Supplementary material for: An ABCC9 Missense Variant Is Associated with Sudden Cardiac Death and Dilated Cardiomyopathy in Juvenile Dogs
Source: MDPI journal article supplement (doi:10.3390/genes14050988), 2023-04-27
Supplement: s1 [file s1]

## **Supplementary Material**

An *ABCC9* Missense Variant is Associated with Sudden Cardiac Death and Dilated Cardiomyopathy in Juvenile Dogs

**Figure S1.** Q-Q plot of the GWAS results.

Quantile-quantile (Q-Q) plot of 91,959 expected versus observed log-transformed  $P$  values from a mixed model genome-wide association study analysis for sudden cardiac death in the young and dilated cardiomyopathy in 12 case and 36 control Manchester Terrier dogs.

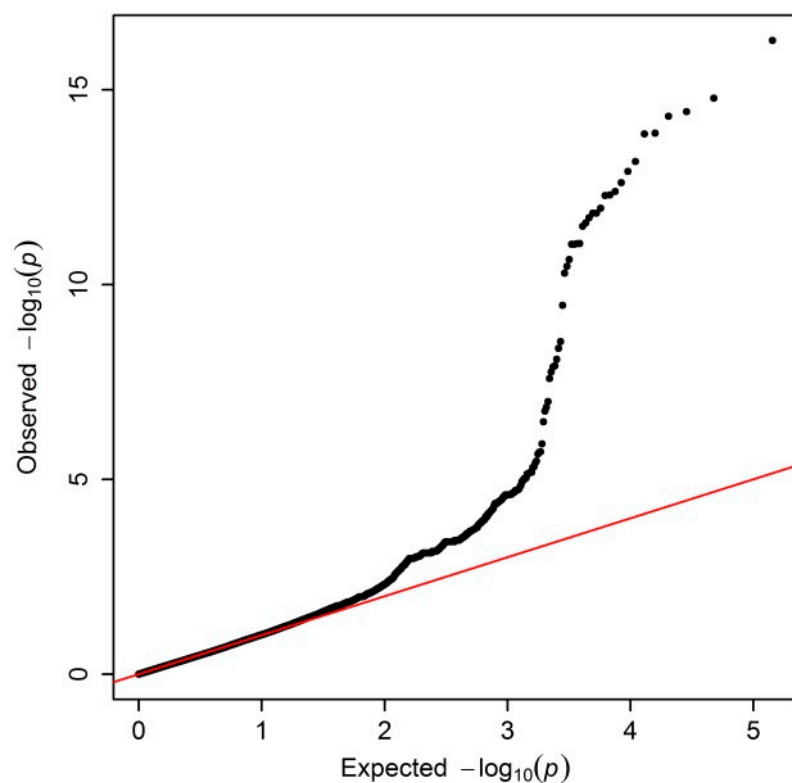

**Figure S2.** Plot of GWAS results for CFA27.

Plot of log-transformed  $P$  values for canine chromosome 27 SNPs (positions for Broad CanFam3.1/canFam3 GenBank GCA\_000002285.2) from a mixed model GWAS analysis for sudden cardiac death in the young and dilated cardiomyopathy in 12 case and 36 control Manchester Terrier dogs. The region containing the top SNPs ( $P < 10^{-8}$ , highlighted in red) is bordered with dashed lines.

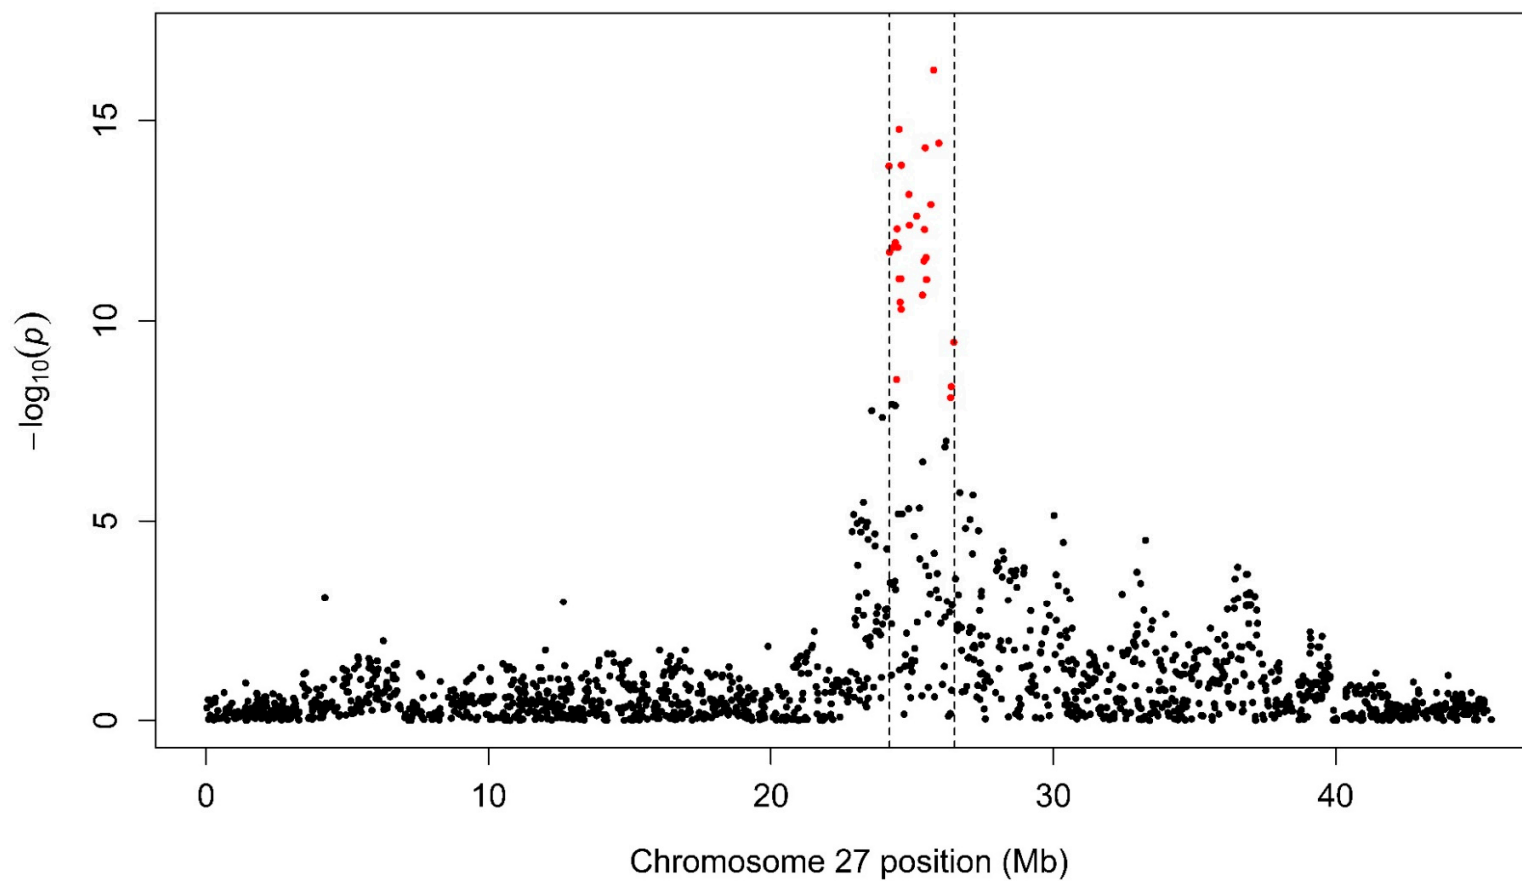

**Figure S3.** Location of the p.R1186Q variant in the predicted ABCC9 protein structure.

The human ABCC9 predicted protein structure (O60706-F1) was obtained from AlphaFold Protein Structure, and the image was created using PyMOL.

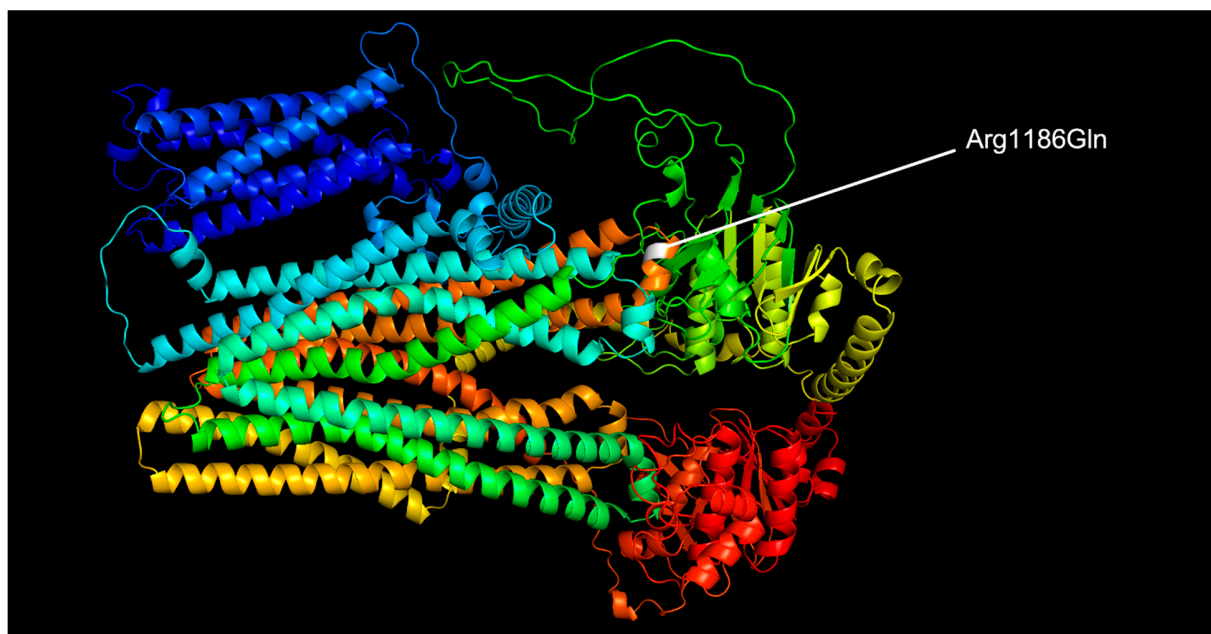

**Table S1.** Top SNPs ( $P < 10^{-8}$ ) associated with SCDY/DCM in a mixed model GWAS in Manchester Terrier dogs (12 cases and 36 controls).

| SNP                     | CHR | Position <sup>a</sup> | <i>P</i> |
|-------------------------|-----|-----------------------|----------|
| BICF2G630150840         | 27  | 25760276              | 5.46E-17 |
| BICF2G630150101         | 27  | 24539912              | 1.65E-15 |
| BICF2G630151366         | 27  | 25946871              | 3.66E-15 |
| BICF2P327797            | 27  | 25462907              | 4.79E-15 |
| BICF2G630150151         | 27  | 24618620              | 1.30E-14 |
| BICF2S23019839          | 27  | 24177413              | 1.37E-14 |
| BICF2P275003            | 27  | 24886868              | 6.96E-14 |
| TIGRP2P351644_rs9069935 | 27  | 25664401              | 1.25E-13 |
| BICF2P292584            | 27  | 25158323              | 2.42E-13 |
| BICF2P908494            | 27  | 24900628              | 4.09E-13 |
| BICF2P544057            | 27  | 24466539              | 5.06E-13 |
| BICF2G630150445         | 27  | 25436543              | 5.22E-13 |
| BICF2G630149956         | 27  | 24404459              | 1.10E-12 |
| BICF2S23755936          | 27  | 24328638              | 1.47E-12 |
| BICF2G630150066         | 27  | 24497260              | 1.47E-12 |
| BICF2S23325539          | 27  | 24199526              | 1.94E-12 |
| BICF2G630150523         | 27  | 25493817              | 2.62E-12 |
| BICF2G630150430         | 27  | 25420527              | 3.21E-12 |
| BICF2G630150142         | 27  | 24601913              | 8.87E-12 |
| BICF2G630150093         | 27  | 24534441              | 8.99E-12 |
| BICF2G630150531         | 27  | 25502241              | 9.31E-12 |
| BICF2G630150563         | 27  | 25514727              | 9.31E-12 |
| BICF2G630150344         | 27  | 25366550              | 2.28E-11 |
| BICF2G630150129         | 27  | 24575466              | 3.43E-11 |
| BICF2G630150147         | 27  | 24613771              | 5.10E-11 |
| BICF2P1208930           | 27  | 26474738              | 3.43E-10 |
| BICF2G630150035         | 27  | 24447332              | 2.91E-09 |
| BICF2G630151587         | 27  | 26387601              | 4.38E-09 |
| BICF2S23236113          | 27  | 26363778              | 8.31E-09 |

<sup>a</sup>Genomic positions are based on the Broad CanFam3.1/canFam3 assembly (GenBank GCA\_000002285.2).

**Table S2.** Protein-coding genes residing in the critical region associated with SCDY/DCM in a mixed model GWAS in Manchester Terrier dogs. Genes are based on annotation for the region spanning CFA27 g.19817148-21651279 bp in the Dog10K\_Boxer\_Tasha/canFam6 assembly (GenBank GCA\_000002285.4).

|                |                           |                           |               |                           |
|----------------|---------------------------|---------------------------|---------------|---------------------------|
| <i>PDE3A</i>   | <i>PYROXD1</i>            | <i>ENSCAFG00000024414</i> | <i>GOLT1B</i> | <i>ABCC9</i>              |
| <i>SLCO1C1</i> | <i>ENSCAFG00000013746</i> | <i>ENSCAFG00000029531</i> | <i>SPX</i>    | <i>ENSCAFG00000011854</i> |
| <i>SLCO1B3</i> | <i>ENSCAFG00000025484</i> | <i>ENSCAFG00000016289</i> | <i>GYS2</i>   | <i>CMAS</i>               |
| <i>SLCO1A2</i> | <i>ENSCAFG00000055974</i> | <i>ENSCAFG00000016278</i> | <i>LDHB</i>   | <i>ST8SLA1</i>            |
| <i>IAPP</i>    | <i>ENSCAFG00000012292</i> | <i>RECQL</i>              | <i>KCNJ8</i>  | <i>C2CD5</i>              |

**Table S3.** PCR primers used for sequencing of *ABCC9* and *KCNJ8* coding exons. The primer set for the PCR product spanning the putative pathogenic variant is bolded.

| Gene/Exon                 | Forward                         | Reverse                      | Product size, bp |
|---------------------------|---------------------------------|------------------------------|------------------|
| <i>ABCC9</i> <sup>a</sup> |                                 |                              |                  |
| 4                         | TCTCAAATGACTTTGGCATAACAG        | GCACAGAAAACCTGGCTTGTTT       | 479              |
| 5                         | TGGGATTTTCATTGCTACCG            | TGCTATTAAATGCGTGACAAATG      | 432              |
| 6                         | CCCAACGTAGTCTTCCTTTC            | GGGGAAGAGAGTGCTCACAG         | 461              |
| 7                         | AACTCCAAAAGTGCATGAAGC           | GGAACACTAATGGCCTGAAAC        | 510              |
| 8                         | GTGGATTAAACATGAAATCTGG          | TGTTCTCCTATCCCTCCTC          | 704              |
| 9                         | TGCATGGAATGCAAGGATATAG          | TTTCTGAACCTGGCTTCTGG         | 625              |
| 10                        | CCAAAATTGCCTTGCTATGG            | TTCAGTGGGTTTACTAATTAGCTCTG   | 477              |
| 11                        | TGCTAAAATGAAGATAGTGGTTGAC       | TTCCAAACCCCTTTCTTAACC        | 492              |
| 12                        | TCCAACAGTCTTAGTTGAGTTGAC        | TGTTTTTGCAACACAGAAAATACAC    | 446              |
| 13                        | AGAGCCAGGCAGAAAATCAAG           | TAGGCTCATGTGGCTAATGG         | 464              |
| 14                        | CAACTGGGCAATGTATGTGG            | CCTTTGAGAAACCTGGATTAG        | 371              |
| 15                        | ACAAGTTTACTGCGGGGATG            | TCCCAGTGGTGACAAACAAG         | 573              |
| 16                        | TCAGAAAGGAAGGCCACTTG            | GAACATGTGCTCAAAGAATTGG       | 482              |
| 17                        | TTTGGAGAGGCCATTGAAAG            | CGGAACACTTTTGGAATGC          | 421              |
| 18                        | TTAGAATTTCACTGTGTGTTT           | GTGAGCTGCATGGTGCAAG          | 359              |
| 18                        | TTGTGTATCAGAGAAAGAAGTTATGC      | AAATTTATGACATTTAAGGTTTCCAC   | 426              |
| 19                        | GGGTAGAACCAGGTCACCTG            | TAAATGTTGGGAACCACTGC         | 487              |
| 20                        | TCAAATTGCACATTGGAAGAC           | TAACCCTCTGCACCTCCTC          | 472              |
| 21                        | TTTAAACACTTCTTTGGCATAGC         | GACCACTTTCCTTCTGCTCCT        | 552              |
| 22                        | TGTCTTTGTATCCACAAACCTACTG       | TCCTATGCTCCCATTTCTGG         | 390              |
| 23                        | GGAGGGCACTTGATTTGATG            | TGATCCTCTGGTGTTCAC           | 460              |
| 24                        | GTGTCCCTGCAGAGTGTGG             | TGGCTATGATCTAAGGAAAGCAC      | 437              |
| 25                        | CACATGCTGACTGGGTAAGAG           | TTACTTTGGGTTTCAAATGAGG       | 427              |
| 26                        | CCTCAGACATTGCCTCACAAC           | TTGCACACACCTTTCTTTG          | 464              |
| 27                        | TGCTCATTCATTCTTTCACC            | GCGATCACATAGATTCTTTTG        | 607              |
| 28                        | GGAAAACCTGCACTCCTTCAAC          | TCTGCGCACTGCTAATGAAC         | 474              |
| 28                        | CAGCTGCCAAAAACCTTCAC            | GCCCCCTCCTTTAAGTTTTATTC      | 529              |
| 29                        | TGGGAAGTGAGTGAAGTTAAAGG         | ATGCCCATGGCTATGTAAGG         | 542              |
| 30                        | <b>TCATGTTTCTCTTCCTTTTAGGTC</b> | <b>CCCAATATGGTGTTCATCTTC</b> | <b>476</b>       |
| 31                        | CCTCTGCTTTGCCACTTCTC            | CCCAATATGGTGTTCATCTTC        | 278              |
| 32                        | CGCACCAAAGCAGTAGTAGC            | TTTTTGGGCTATTTGTCTTGC        | 482              |
| 33                        | TTCCACATCAGGCTCCCTAC            | TCCACTCTGCCCTAAATGC          | 431              |
| 34                        | CCATGACACTCTCCCTGGTC            | GGCCTAGTCATATCGTTTCAGG       | 457              |
| 35                        | TCCCCTTTCTCTCCCTCTC             | TGGGAGACTAATGAACAGCAATAC     | 484              |
| 36                        | GGAGACCTAAGAAAAGAATGAGG         | CTACAGGGAGCCTGATGTGG         | 372              |
| 37                        | GAGATGCATAATGATGTTTGTAACC       | TTTCCCAAACCAAATTGTTG         | 412              |
| 38                        | ATGCCTGCTCTATCCTGAGC            | CATTCTCACGGGAATGTGC          | 581              |
| 39                        | GGATGGCTCAGGATCATCTTC           | TCTGAATGTGCTACCATCAGTTG      | 477              |
| 40                        | CACCTACACAGAAGGCAGGAG           | AAGGCTTTCAGAGCATAGCTG        | 370              |
| 41                        | CCCAGTCACACACACTCACC            | TGAAGCAGTAAAATCTTGGAAGAC     | 537              |
| <i>KCNJ8</i> <sup>b</sup> |                                 |                              |                  |
| 3                         | GACATGGGGGAGGAGAAAG             | CGAAGGCACTTAAAGCAAATG        | 613              |
| 4                         | CCTTTGGAGGGAGAAAATGG            | TGCTTGAATATGAGCATCTGG        | 1100             |
| 4                         | AGAACCGTTTCCAGAAAGTC            | CTTCTTGACCACCTGGATGC         | 549              |
| 4                         | GTGGGGGACCTAAGGAAGAG            | TCGGATGGAGTTGTTTCTCC         | 564              |
| 4                         | CCCTCCAGAAGAGTGAGCTG            | CAGAAAGTGCTGTTGCTTGA         | 288              |

<sup>a</sup>Exon number based on transcript ENSCAFT00000043641.4.

<sup>b</sup>Exon number based on transcript ENSCAFT00000049622.3.
